# Supplementary material
Source: PubMed Central journal article supplement (PMC2630069)
Supplement: 0810055106_0810055106SI.pdf [file 0810055106_0810055106SI.pdf]

# Supporting Information

Xu et al. 10.1073/pnas.0810055106

**Table S1. Measurements (in mm) of integumentary filaments in several nonavian theropods**

| Measured area                    | <i>Sinosauropteryx</i> (IVPP V12415) | <i>Dilong</i> (IVPP V11579) | <i>Sinornithosaurus</i> (IVPP V12811) | <i>Beipiaosaurus</i> |
|----------------------------------|--------------------------------------|-----------------------------|---------------------------------------|----------------------|
| Filament width                   | 0.08–0.2                             | 0.3                         | 0.3                                   | 2–3                  |
| Filament length (skull)          | 9 (90)                               | ?                           | 25–45 (150)                           | 100–150 (200)        |
| Filament length (cervical 2)     | 12 (9)                               | ?                           | X                                     | 130 (30)             |
| Filament length (distal caudals) | 40 (13)                              | 20 (20)                     | X                                     | >80 (12)             |

Numbers in parentheses pertain to the skeletal elements associated with the filaments. The length of the filaments associated with the distal caudals in *Beipiaosaurus* was obtained from the holotype, and other lengths were obtained from STM31-1. Measurements for *Sinornithosaurus* are from the neck and cranial region.
